# 1 **A Multi-Niche Microvascularized Human Bone-Marrow-on-a-Chip**

2

## 3 **Authors**

4 Michael R. Nelson,<sup>1</sup> Delta Ghoshal,<sup>1</sup> Joscelyn C. Mejías,<sup>1</sup> David Frey Rubio,<sup>1</sup> Emily Keith,<sup>1</sup>

5 Krishnendu Roy<sup>1,2\*</sup>

6

## 7 **Affiliations**

8 <sup>1</sup>The Wallace H. Coulter Department of Biomedical Engineering, Georgia Institute of Technology  
9 and Emory University, Atlanta, GA 30332, USA

10 <sup>2</sup>The Parker H. Petit Institute for Bioengineering & Bioscience, Georgia Institute of Technology,  
11 Atlanta, GA 30332, USA

12

13 \*Corresponding author:

14 Robert A. Milton Chair

15 Center for ImmunoEngineering at Georgia Tech

16 The Wallace H. Coulter Department of Biomedical Engineering at Georgia Tech and Emory

17 University

18 The Parker H. Petit Institute for Bioengineering & Bioscience

19 EBB 3018, Georgia Institute of Technology, Atlanta, GA 30332, USA

20 Email: [krish.roy@gatech.edu](mailto:krish.roy@gatech.edu)

## 21 **Abstract**

22 The human bone marrow (hBM) is a complex organ critical for hematopoietic and immune  
23 homeostasis, and where many cancers metastasize. Yet, understanding the fundamental biology of  
24 the hBM in health and diseases remain difficult due to complexity of studying or manipulating the  
25 BM in humans. Accurate *in vitro* models of the hBM microenvironment are critical to further our  
26 understanding of the BM niche and advancing new clinical interventions. Although, *in vitro*  
27 culture models that recapitulate some key components of the BM niche have been reported, there  
28 are no examples of a fully human, *in vitro*, organoid platform that incorporates the various niches  
29 of the hBM - specifically the endosteal, central marrow, and perivascular niches – thus limiting  
30 their physiological relevance. Here we report an hBM-on-a-chip that incorporates these three  
31 niches in a single micro-physiological device. Osteogenic differentiation of hMSCs produced  
32 robust mineralization on the PDMS surface (“bone layer”) and subsequent seeding of endothelial  
33 cells and hMSCs in a hydrogel network (“central marrow”) created an interconnected vascular  
34 network (“perivascular niche”) on top. We show that this multi-niche hBM accurately mimics the  
35 ECM composition, allows hematopoietic progenitor cell proliferation and migration, and is  
36 affected by radiation. A key finding is that the endosteal niche significantly contributes to hBM  
37 physiology. Taken together, this multi-niche micro-physiological system opens up new  
38 opportunities in hBM research and therapeutics development, and can be used to better understand  
39 hBM physiology, normal and impaired hematopoiesis, and hBM pathologies, including cancer  
40 metastasis, multiple myelomas, and BM failures.

41

## 42 Introduction

43 Hematopoietic stem cells (HSCs) reside and self-renew in the bone marrow (BM) throughout  
44 adulthood, where multipotency is maintained and hematopoietic progenitor cells (HPCs)  
45 differentiate to maintain hematopoietic homeostasis (1). The microenvironment that maintains  
46 HSC potency and regulates differentiation of HPCs, i.e. the HSC niche, is characterized by BM  
47 stromal cells, extracellular matrix (ECM), and biochemical and physical signals (2-4). The HSC  
48 niche can be disrupted, naturally with age, with radiation or chemotherapies, or by primary and  
49 metastatic malignancies in the BM, and also through the mobilization of HSCs for apheresis.  
50 Novel, human, and potentially patient specific, models of this microenvironment are critical to  
51 advancing our understanding of the BM niche, develop new BM directed therapeutics, and  
52 evaluate the effects and predict the success (or failure) of clinical interventions (5).

53 Our understanding of the location and composition of the BM microenvironment has been  
54 changing over the last two decades. Early research had indicated that HSCs resided in a hypoxic,  
55 endosteal niche, where potency was maintained (6, 7). However, recent findings have shown that  
56 multi-potent HSCs are perivascular and exist in a niche maintained by endothelial cells and  
57 perivascular stromal cells (8-10). Across these distinct microenvironments, a number of stromal  
58 cells, including osteoblasts, MSCs, endothelial cells, CXCL12-abundant reticular (CAR) cells,  
59 adipocytes, macrophages, and osteocytes have all been implicated in regulating HSC fate (11-13).  
60 As HSCs differentiate, hematopoietic progenitor cells (HPCs) occupy distinct microenvironments  
61 within the BM, where they differentiate into lymphoid and myeloid lineages (14).

62 The ability to replicate the juxtaposition and interaction of the endosteal and perivascular niches is  
63 important to understand the complexity of the human BM niche (Fig 1A). The endosteal niche is  
64 primarily constituted by osteoblasts (OBs) and osteoclasts. OBs express extracellular matrix  
65 (ECM) in the endosteal microenvironment (e.g., collagen I (Col I), fibronectin (FN), and  
66 osteopontin (OPN)). OBs also provide soluble and surface bound signals, like jagged-1 (JAG1)  
67 and stem cell factor (SCF), to HSCs and HPCs that regulate differentiation and potency. The  
68 endosteal niche was believed to be relatively hypoxic and this was thought to promote HSC  
69 maintenance of potency; however, recent studies have not found the endosteal niche to be hypoxic  
70 (15). In part, this is due to the high vascularization throughout the bone compartment. BM  
71 sinusoids permeate the bone cavity and serve as the connection between BM and peripheral  
72 tissues, allowing for the egress of progenitors of the hematopoietic system. Endothelial cells (ECs)  
73 comprise the BM sinusoids and are accompanied by mesenchymal stromal cells (MSCs) or  
74 pericytes in establishing the perivascular niche. Abundant levels of stromal derived factor 1 (SDF1  
75 or CXCL12) and SCF are expressed in the perivascular space to establish the HSC niche and  
76 recent *in vivo* studies have observed HSCs to be resident in the perivascular niche (16-18).

77 The HSC niche has been a subject of study for decades and there have been many efforts to  
 78 recapitulate aspects of the niche *in vitro*. Various material approaches and simple co-culture  
 79 platforms in both 2D and 3D have been reported to increase HSC proliferation or maintain HSC  
 80 potency during *in vitro* culture (19-21). Culture systems have been developed that mimic specific  
 81 cytokine (22) or ECM (23) environments that HSCs experience in the BM niche *in vivo*. More  
 82 recently, *ex vivo* and *in vitro* microfluidic or on-chip devices have been designed for recreating the  
 83 bone or BM microenvironment (24-26). These studies recapitulate many characteristics of bone  
 84 marrow; however, they either require lengthy ectopic implantation in animal models, or do not  
 85 recreate the vasculature of BM, or do not incorporate the multiple juxtaposed niches of the BM  
 86 microenvironment (especially the endosteal niche with the central marrow and a perivascular niche  
 87 together), and ultimately are neither fully human nor complete models of the hBM.

88 Here, we present a simple microfluidic human BM-on-a-chip (hBM-on-a-chip) that can be used to  
 89 create a human MSC-derived endosteal surface overlaid with a microvascular hydrogel network  
 90 with hMSCs representing the central marrow and perivascular niches - that mimic the basic multi-  
 91 niche structure of the human BM (Fig. 1B). We demonstrate the use of this device to study HSC  
 92 response to a variety of stimuli, such as radiation and clinical HSC mobilization agents. This  
 93 device can also be used to study human BM physiology and pathologies, including cancer  
 94 metastasis, multiple myelomas, and bone marrow failures.

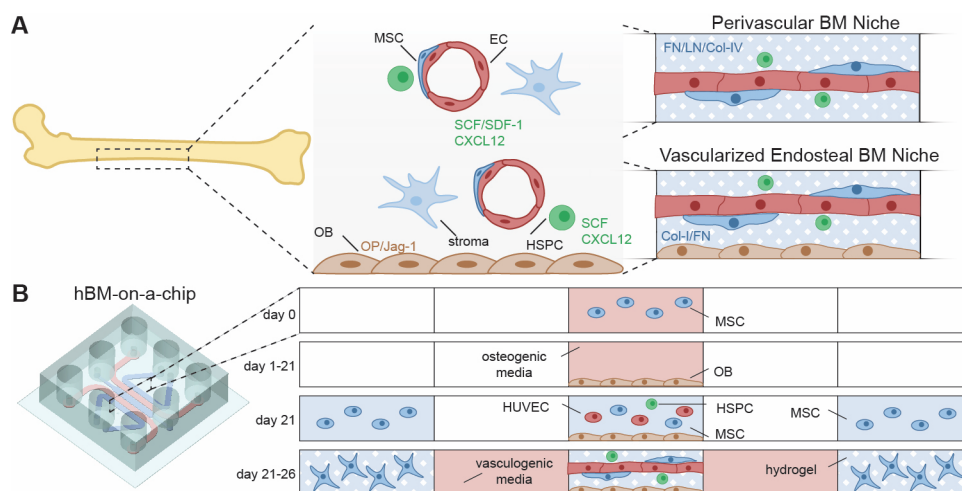

95  
 96 **Fig. 1. Schematic of human bone marrow-on-a-chip (hBM-on-a-chip).** (A) The hBM-on-a-chip  
 97 can recapitulate both the central perivascular BM niche (without OBs) and the vascularized  
 98 endosteal BM niche (with OBs) that are found in the cavities of long bones. MSC = mesenchymal  
 99 or marrow stromal cells, including pericytes; OB = osteoblasts and mineralized bone-like tissue  
 100 layer; stromal cells = other cells of the BM stroma including CXCL12-abundant reticular cells  
 101 (CAR), matured hematopoietic cells, and adipose cells. Note the area between vasculatures  
 102 represent the central marrow region. FN = Fibronectin; LN = Laminin, Col-I and Col-IV =  
 103 Collagen I and Collagen IV; OP = Osteopontin; Jag-1 = Jagged 1. (B) A 5-channel PDMS

104 microfluidic device was fabricated using standard soft lithography techniques. MSCs are first  
105 differentiated for 21 days in the central channel of the device to form an endosteal layer, then  
106 HUVECs, MSCs, and HSPCs are loaded on top of the endosteal layer and vasculogenesis occurs  
107 over 5 days to form the hBM-on-a-chip.

## 108 **Results**

### 109 **Design and Fabrication of a Multi-niche hBM-on-a-Chip**

110 A five-channel device was designed and fabricated with a height of 150  $\mu\text{m}$  and consists of one  
111 central “gel channel”, two media channels, and two outer gel channels (Fig. S1A). The device was  
112 designed similarly to recently published methods (27, 28), but with modifications that (A)  
113 promoted maintenance of the air-liquid interface between the central channel and adjacent media  
114 channels, and (B) allowed for loading of cells and hydrogel precursors into a previously wetted  
115 channel. Essential to this approach is the ability to wet the central channel during the  
116 differentiation of hMSCs while keeping the adjacent media channels dry throughout the process so  
117 that a second set of cells can be loaded within the central channel. To achieve this, the  
118 communication pores between the gel channels were narrowed (compared to similar, previously  
119 published devices) to 50  $\mu\text{m}$  in width and the number of communication pores were limited to  
120 decrease the occurrence of media leaking from the central channel during osteogenesis. The  
121 theoretical difference between advancing pressure and burst pressure (Supplementary Methods)  
122 was calculated to be 28.5 cm  $\text{H}_2\text{O}$  which allows for simple and easy loading of fluid into the  
123 device. However, extended culture of the devices in a humid environment results in wetting of  
124 interior, dry surfaces of PDMS that leads to “failure” of the devices. This is mitigated by thorough  
125 cleaning of the devices with 70% EtOH and subsequent drying at 65  $^\circ\text{C}$  and can produce devices  
126 that “survive” the 21-day differentiation at a rate >90% (Fig. S2B).

127 This approach requires the central channel to be accessible by both a small port (1 mm) for initial  
128 and subsequent loading of cells, and a larger media reservoir (4 mm) for extended culture of the  
129 hMSCs during osteogenic differentiation. During our initial studies, we approached this challenge  
130 by fabrication of a 3-layer PDMS device (Fig. S1D, E) consisting of (a) a PDMS coated glass  
131 coverslip, (b) a middle-feature layer, and (c) a reservoir layer. This fabrication method was  
132 appropriate for initial studies because it allowed for fabrication of individual devices while failure  
133 rates were high, and its modular composition permitted parallel iteration of parts. However, as the  
134 design became finalized, this fabrication method proved to be inefficient and time intensive. To  
135 improve efficiency of fabrication, we developed a simplified method that combined the feature  
136 layer and the reservoir layer through a two-step PDMS casting protocol where a 3D printed mold  
137 was used to create media reservoirs (Fig. S1F, G). This fabrication protocol substantially  
138 decreased device fabrication time and increased material efficiency.

139 To further improve on the design and standardization of hBM-on-a-chip, a microfluidic platform  
140 was developed to integrate the platform into a standard, well-plate format. Using previously  
141 published methods (29-31), the PDMS “device” layer was bonded directly to a commercially  
142 available, bottomless 96-well plate (Fig. S1H, I). The resulting array of 8 devices uses the wells of  
143 the plate as media reservoirs and as a window for imaging the central channel of the device (Fig.  
144 S1J, K). This process creates an array of devices that are consistently oriented within known well  
145 locations, making the platform easily transferable to automated imaging, or potentially, media  
146 handling instrumentation. An unexpected benefit of moving to this fabrication method was the  
147 increased “survival” of devices during the 21-day differentiation of MSCs. This was most likely  
148 because the PDMS portion of the construct is fixed to a rigid polystyrene frame, so there were no  
149 longer small deformations due to handling of the devices during loading and culture, resulting in a  
150 much lower frequency, less than 5%, of device “failure” (Fig. S2C).

### 151 **On-Chip Osteogenic differentiation of hMSCs Create Mineralized Endosteal Niche**

152 To promote cell adhesion to the bottom surface of PDMS within the central channel of the device,  
153 microfluidic devices were coated with polydopamine (PDA) and collagen I(32), which was found  
154 to improve attachment of hMSCs when compared to collagen I or fibronectin alone (Fig. S2A).  
155 hMSCs were then seeded at a high density within the central channel of the device and  
156 differentiated with osteogenic media over a period of 21 days. Mineralization of matrix was  
157 observed by Alizarin red (Fig. 2A, B) and von Kossa (Fig. 2C, D) staining. Mineralization  
158 increased over the 21-day differentiation. At 21 days,  $71\pm 18\%$  of the area of the device stained  
159 positive for Alizarin red and the normalized mean intensity of the stained device was  $0.64\pm 0.07$ .  
160 Similarly, at 21 days  $91\pm 3\%$  of the area of the device stained positive for von Kossa and the  
161 normalized mean intensity was  $0.60\pm 0.06$ . In addition to mineralized matrix, the expression of  
162 specific cytokines and ECM components is of interest when creating a surrogate endosteal niche.  
163 After 21 days differentiation, the differentiated hMSCs expressed cytokines (SCF, CXCL12,  
164 JAG1) and ECM (FN, OPN) characteristics of the endosteal niche (Fig. 2E-I).



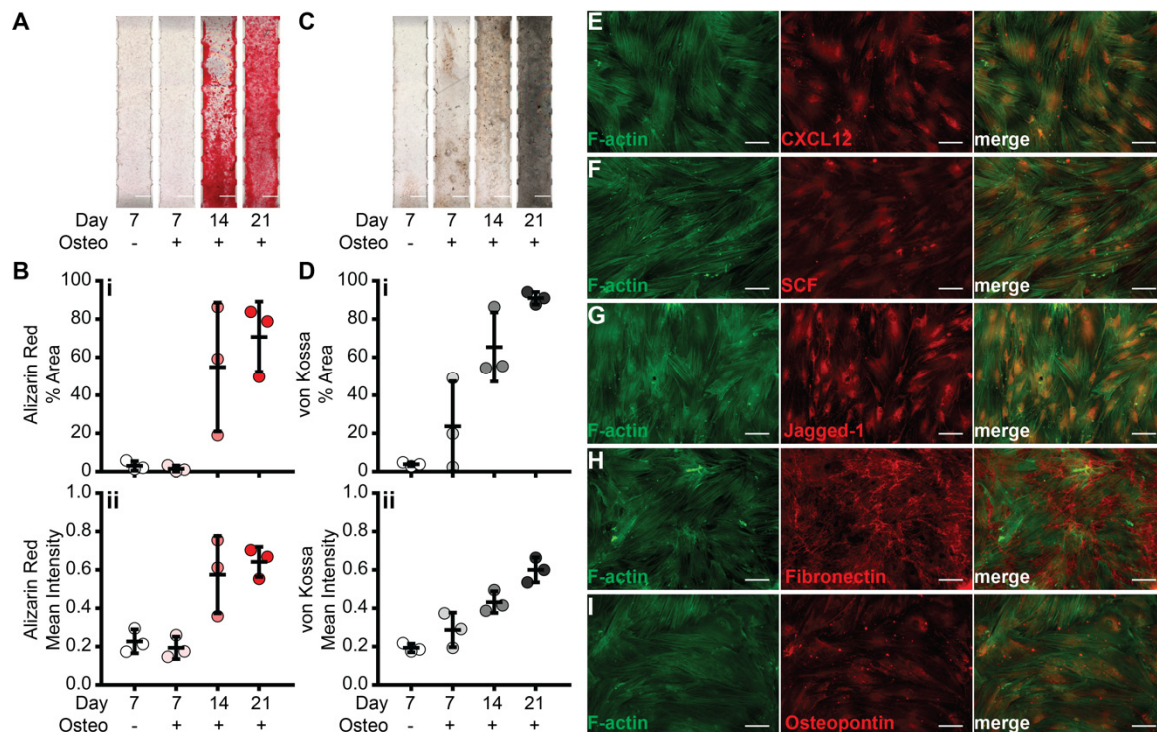

**Fig. 2. Formation of the endosteal niche.** MSCs were differentiated for 21 days within the central channel of the hBM-on-a-chip after which mineralization was measured. Representative images of (A) alizarin red and (C) von Kossa staining. Scale bars: 500  $\mu$ m. Quantification of (B) alizarin red and (D) von Kossa staining by (i) percent area and (ii) mean intensity. Data are plotted as mean  $\pm$  SD (n = 3 devices). Immunofluorescence staining of endosteal cytokines (E) CXCL12, (F) SCF, and (G) jagged-1. Immunofluorescence staining of endosteal ECM (H) fibronectin, and (I) osteopontin, was observed using immunofluorescence staining. Scale bars: 100  $\mu$ m.

### hMSCs co-cultured with Endothelial Cells in a Fibrin-Collagen Gel Allows Robust Generation of the Central Marrow and Perivascular Niche on the Endosteal Niche

In recent years, several groups have published methods for *in vitro* vasculogenesis in similar microfluidic platforms (27, 28, 33, 34). We found that perfusion of the vasculature was most consistent using a combination of hMSCs in laterally adjacent channels, supplementation with vascular endothelial growth factor (VEGF) and angiopoietin-1 (ANG-1), and encapsulation of endothelial cells in a fibrin/collagen co-gel (Fig. S3). Seeding HUVECs and hMSCs on top of the newly formed endosteal surface and culturing under these conditions for 5 days created vasculature in a reproducible manner.

#### *Effect of stromal cells on vasculogenesis*

hBM-on-a-chip microfluidic devices were created with and without hMSCs and the differentiated endosteal layer (OBs) to measure the effect of stromal cells on vasculogenesis and cytokine secretion (Fig. 3A). We observed no significant difference in the vasculature area containing hMSCs (41.4 $\pm$ 4.4%), OBs (44.1 $\pm$ 2.9%), or both cell types (44.3 $\pm$ 3.1%) when compared between

187 groups or to devices containing ECs only (43.39±3.3%) (Fig. 3B). Similarly, no significant  
 188 difference in the total length of the vasculature networks was observed between devices containing  
 189 hMSCs (83.0±13.0 mm), OBs (92.9±12.2 mm), both hMSCs and OBs (92.1±10.8 mm), or neither  
 190 (83.3±6.2 mm) (Fig. 3C). Although there was no significant difference, it is worth noting that the  
 191 devices containing OBs exhibited vasculature that covered marginally less area and had a slightly  
 192 increased total length of the network, which indicates a smaller average diameter of the newly  
 193 formed vasculature compared to devices without OBs.

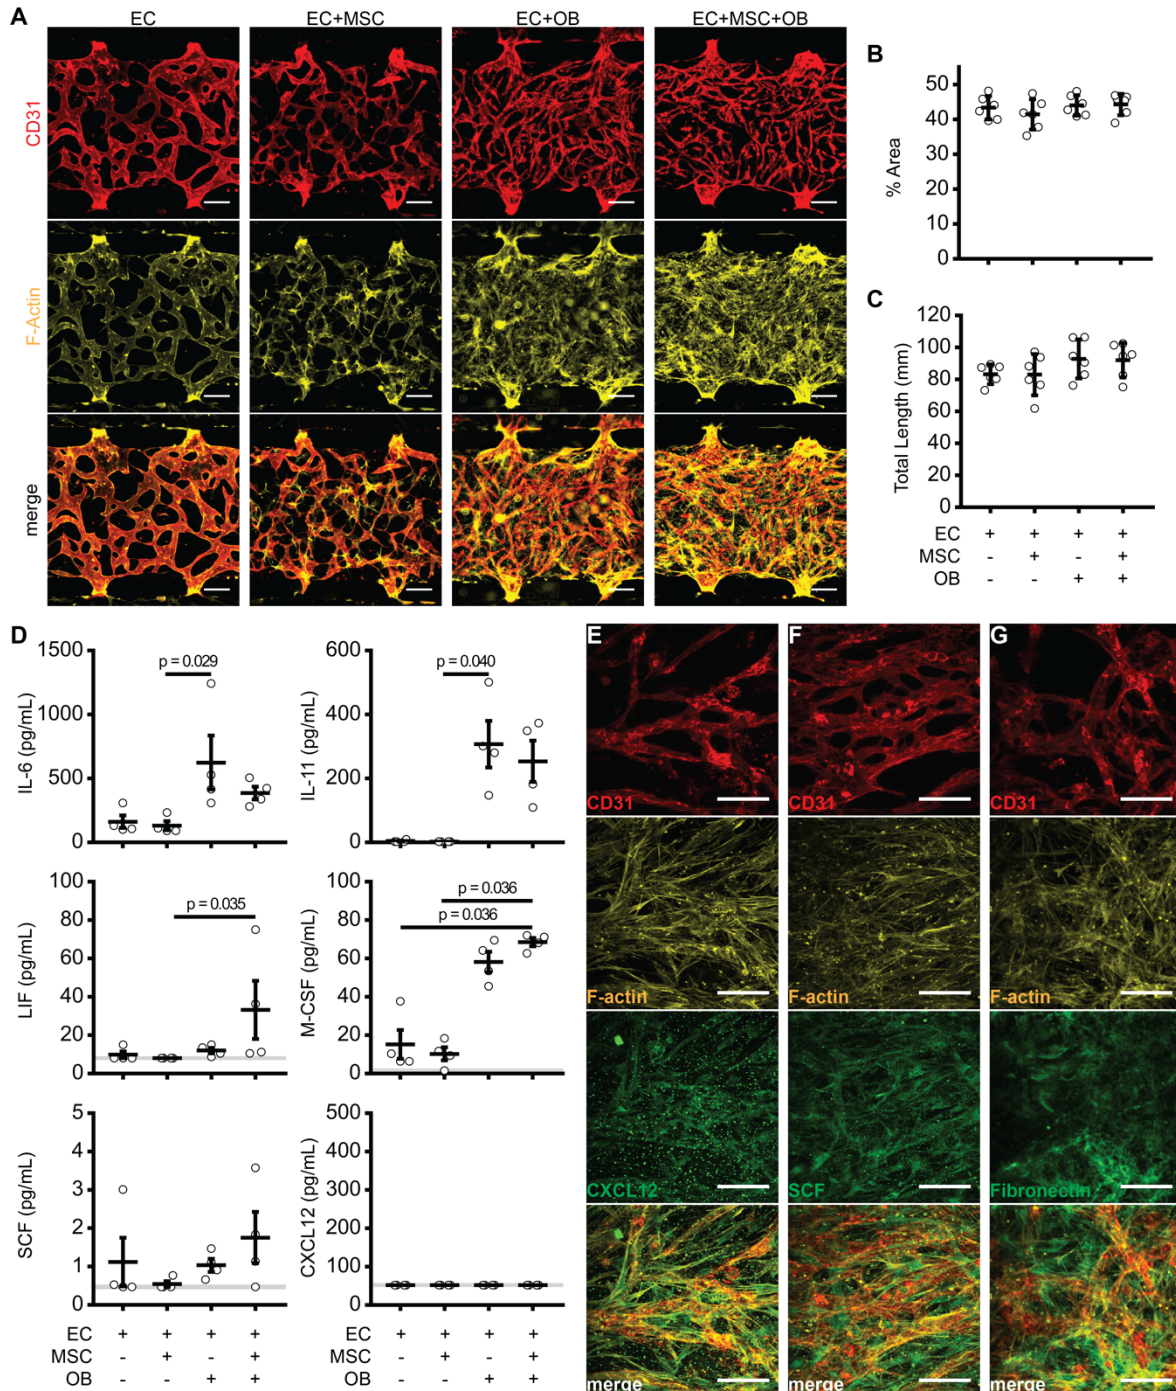

194



195 **Fig. 3. Vasculogenesis and cytokine expression in hBM-on-a-chip.** hBM-on-a-chip with  
196 or without MSCs and OBs created using a fibrin (4 mg/mL) and collagen I (1 mg/mL) co-gel with  
197 VEGF (50 ng/mL, days 1-5) and Ang-1 (100 ng/mL, days 3-5) supplementation. (A)  
198 Immunofluorescence staining of CD31 (red) and F-actin (yellow). Scale bars: 100  $\mu$ m.  
199 Quantification of the (B) percent area and (C) total length of vascular networks. Data are plotted as  
200 mean  $\pm$  SD (n = 4-6 devices). Data were analyzed using a one-way ANOVA with Tukey's post  
201 hoc test. No significance found at  $p < 0.05$ . (D) Hematopoietic cytokine secretion measured in  
202 device supernatant collected on day 5. Data are plotted as mean  $\pm$  SEM (n = 4 devices). Data were  
203 analyzed using Kruskal-Wallis w/ Dunn's post hoc test. Significance between groups ( $p < 0.05$ ) is  
204 indicated in the figure. Immunofluorescence staining of (E) CXCL12, (F), SCF, (G) fibronectin  
205 after 5 days vasculogenesis in EC+MSC+OB hBM-on-a-chip. Scale bars: 100  $\mu$ m.

### 206 *Effect of stromal cells on cytokine secretion*

207 We observed differences in cytokine expression as function of stromal cell inclusion using  
208 multiplex cytokine detection to analyze the supernatant collected from the devices on day 5 of  
209 vasculogenesis (Fig. 3D). OB containing devices, in general, secreted higher amounts of  
210 cytokines. IL-6, a cytokine involved in B cell differentiation, was highly expressed in EC+OB  
211 (624 $\pm$ 212 pg/mL) and EC+MSC+OB (386 $\pm$ 49 pg/mL) samples, less was measured to be present in  
212 EC (162 $\pm$ 49 pg/mL) and EC+MSC (132 $\pm$ 34 pg/mL). IL-11, which is responsible for signaling  
213 during megakaryocyte maturation, was measure in trace concentrations in EC (4.1 $\pm$ 1.8 pg/mL)  
214 devices and not at all in EC+MSC samples, while substantial concentrations were observed in  
215 EC+OB (308 $\pm$ 73 pg/mL) and EC+MSC+OB (254 $\pm$ 64 pg/mL) devices. Similarly, M-CSF, which  
216 induces macrophage differentiation of HSCs, was elevated in EC+OB (58.3 $\pm$ 5.3 pg/mL) and  
217 EC+MSC+OB (68.6 $\pm$ 2.1 pg/mL) devices, while little was detected in EC (15.2 $\pm$ 7.6 pg/mL) and  
218 EC+MSC (10.3 $\pm$ 3.5 pg/mL) devices. Relatively small concentrations of IL-7 (lymphoid  
219 progenitors), IL-34 (monocytes and macrophages), GM-CSF (granulocytes and macrophages),  
220 FLT-3L (dendritic cells), and SCF (HSC maintenance) were measured and there was no significant  
221 difference across groups. For both CXCL12 (hematopoietic chemoattractant) and IL-3 (myeloid  
222 progenitors), no measurable analytes were detected.

### 223 **Characterization of cytokine and ECM expression on the hBM-on-a-chip**

224 After 5 days of vasculogenesis, hBM-on-a-chip containing the endosteal layer and subsequently  
225 seeded hMSCs and HUVECs were fixed and stained to characterize the presence and localization  
226 of cytokines and ECM relevant to the BM niche (Fig. 3E-G). CXCL12 and SCF were both found  
227 to be expressed by perivascular and endothelial cells. Fibronectin was observed to be present in the  
228 "central marrow" space outside of the newly formed vasculature. This arrangement of cytokine  
229 expression is consistent with the distribution that has been seen *in vivo*.

230  
231  
232  
233  
234  
235  
236  
237  
238  
239  
240

### HSPCs in hBM-on-a-chip

We next sought to investigate the inclusion of BM HSPCs in the hBM-on-a-chip and how MSCs and OBs affected their fate in our BM model. BM CD34<sup>+</sup> cells were briefly expanded *in vitro* out of cryo-storage and then loaded into the central channel with HUVECs and MSCs. We measured the expansion of the HSPCs via microscopy over the 5 days of culture during vasculogenesis (Fig. 4A and Fig. S4A). On day 1, the number of HSPCs in hBM-on-a-chip was not significantly different in MSC and/or OB containing devices. By day 3 and continuing to day 5, devices without OBs had significantly more HSPCs than devices with the endosteal layer. HSPCs culture with ECs and MSCs expanded 2.41- and 2.28-fold, respectively, over 5 days, whereas both groups with HSPCs cultured in the presence of the pre-formed endosteal layer only expanded 1.83-fold (Fig. 4Aii).

241  
242  
243  
244  
245

HSPCs will rapidly differentiate when cultured *in vitro*. We attempted to measure the effect of MSCs and OBs on the differentiation of HSPCs in the hBM-on-a-chip by staining for CD34 (Fig. 4B). HSPCs were pre-labeled with the membrane dye PKH67 to identify HSPCs for subsequent fluorescence quantification (Fig. S4B). We observed increased expression of CD34 in the presence of MSCs and/or OBs, as well as an increase in the percentage of CD34<sup>+</sup> HSPCs.

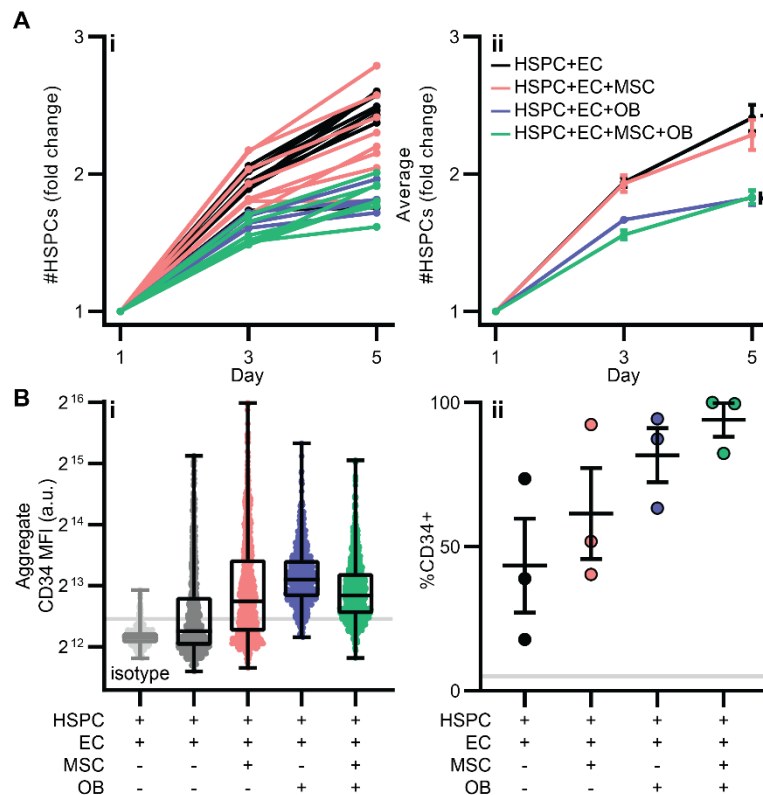

246  
247  
248  
249  
250

**Fig. 4.** (A) Fold change number of HSPCs ((i) individual devices and (ii) summary data) on days 1, 3, and 5. Data are shown as mean  $\pm$  SEM. ( $n = 4$  devices EC+OB,  $n = 7$  devices EC+MSC +OB,  $n = 8$  devices EC and EC+MSC). Data were analyzed using Kruskal-Wallis w/ Dunn's multiple comparisons test. EC vs EC+OB  $p = 0.0813$ ; EC vs EC+MSC+OB  $p = 0.0162$ . (B) Quantification

251 of immunofluorescence of HSPCs cultured for 5 days in hBM-on-a-chip with ECs only (black),  
252 with MSCs (red), OBs (blue), and both (green). (i) Aggregate MFI of CD34. Data are shown with  
253 median, quartiles, min and max (n = 452 cells for isotype from 1 device, n = 800 cells for EC, n =  
254 907 cells EC+MSC, n = 945 cells EC+OB, n = 799 cells EC+MSC+OB pooled from 3 devices).  
255 (ii) Percentage of CD34<sup>+</sup> cells. Data are shown as mean ± SEM (n = 3 devices). Grey line is  
256 percentage of CD34<sup>+</sup> cells in isotype sample using gating scheme.

### 257 **Mobilization of CD34<sup>+</sup> HSPCs in hBM-on-a-chip**

258 In order to measure the mobilization of HSPCs in hBM-on-a-chip, we designed an experimental  
259 assay where devices were imaged every 2 hours over a 24-hour period after treatment with  
260 mobilizing agents (Fig. S5). During each imaging session, devices were imaged 4 times in 5-  
261 minute intervals and these images were used to track cell movement and measure the length and  
262 displacement at discrete points in time during the 24-hour period. Untreated samples showed  
263 relatively steady movement of HSPCs when measured by either the length (Fig. S5B) or  
264 displacement (Fig. S5C) over 24 hours.

265 Treatment of hBM-on-a-chip (EC+MSC+OB+HSPC) with 10 ng/mL or 100 ng/mL G-CSF  
266 resulted in a moderate increase in the relative length and displacement of HSPCs at the lower  
267 concentration (Fig. 5A). After treatment with 10 ng/mL G-CSF, HSPCs had an increased tracked  
268 length between approximately 2-14 hours post-treatment. Untreated and samples mobilized with  
269 100 ng/mL G-CSF did not show any sustained increase in HSPC tracked length but instead had a  
270 steady decrease from the peak at the 0-hour baseline measurement.

271 To determine whether the endosteal niche affected mobilization by G-CSF we measured  
272 mobilization in hBM-on-a-chip with OBs (a vascularized endosteal niche model) and without OBs  
273 (a perivascular niche model). Similar to the previous, dosing experiment (Fig. 5A), with an  
274 endosteal niche present (+OB) devices treated with 10 ng/mL G-CSF had increased HSPC track  
275 length from approximately 2-14 hours post-treatment when compared to the untreated +OB control  
276 (Fig. 5Bii). Without an endosteal niche, there was no trend in increased track length or  
277 displacement when compared to the untreated -OB control (Fig. 5i).

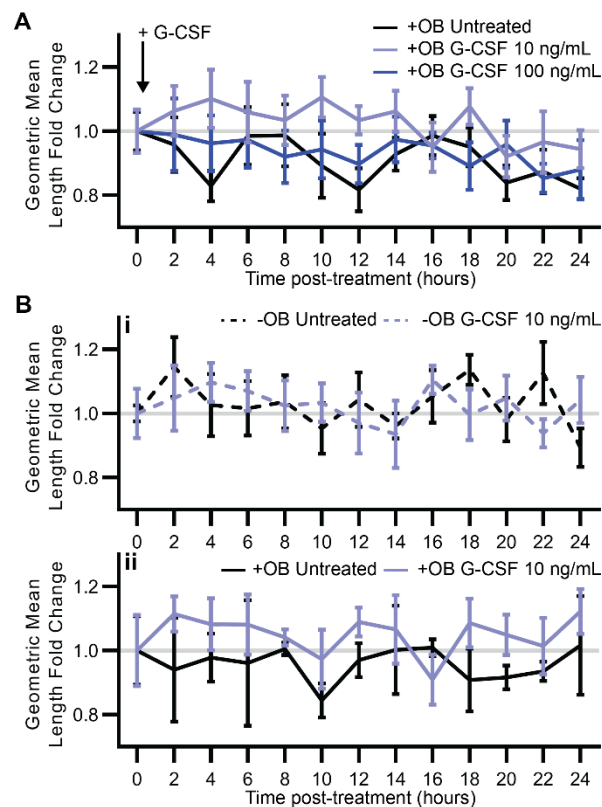

278

279 **Fig. 5. Mobilization of CD34<sup>+</sup> BM HSPCs using G-CSF.** hBM-on-a-chip

280 (HSPC+EC+MSC+OB) were untreated (black) or treated with 10 ng/mL G-CSF (light blue) or

281 100 ng/mL G-CSF (dark blue) and movement of HSPCs was measured over 24-hours. (A)

282 Geometric mean tracked length fold change during 15-minute imaging sessions at 2-hour intervals.

283 Data are shown as mean of geometric means  $\pm$  SEM (n = 7 devices untreated, n = 8 devices 10

284 ng/mL and 100 ng/mL G-CSF). (B) hBM-on-a-chip (i) without OBs (dotted lines) and (ii) with

285 OBs (solid lines) were treated with 10 ng/mL G-CSF (light blue) or were untreated (black) and

286 movement of HSPCs was measured over 24-hours. Data are shown as mean of geometric means  $\pm$

287 SEM (n = 3 devices +OB untreated, n = 5 devices -OB untreated, n = 6 devices -OB and +OB 10

288 ng/mL G-CSF).

289

290 **Radiation of CD34<sup>+</sup> HSPCs in hBM-on-a-chip**

291 To investigate the effect of ionizing radiation on the BM microenvironment in hBM-on-a-chip,

292 after 5 days of vasculogenesis, devices containing OBs, MSCs, and ECs were exposed to 0 Gy, 2.5

293 Gy, 5 Gy, or 10 Gy X-ray irradiation. Device supernatant was collected at 0 hours (pre-treatment)

294 and 24 hours radiation exposure. To measure cytotoxicity because of radiation, the change in

295 lactate dehydrogenase (LDH) activity of the supernatant after irradiation was measured (Fig. S6C).

296 Although we did not measure a significant increase in LDH activity, the LDH activity in devices

297 exposed to 5 Gy and 10 Gy X-ray radiation marginally increased after exposure, while the activity

298 in devices exposed to 0 Gy and 2.5 Gy radiation slightly decreased during the same period.

299 The change in cytokine secretion because of X-ray exposure was also measured. IL-6, IL-7, IL-11,  
300 M-CSF, and SCF were detected, however CXCL12, IL-3, IL-15, IL-34, GM-CSF, FLT3L, and  
301 LIF were not above the detection limit of the assay. While there was no significant difference  
302 between the groups, it is worth noting that there was a decrease in secretion of IL-6, IL-7, IL-11,  
303 M-CSF, and SCF for all irradiated groups (Fig. S6D).

304 We sought to determine whether the presence of the endosteal niche was ameliorating the effects  
305 of radiation for HSPCs. hBM-on-a-chip with (EC+MSC+OB+HSPC) and without  
306 (EC+MSC+HSPC) the endosteal niche, were exposed to 5 Gy X-ray radiation and again apoptosis  
307 was measured 24 hours after exposure via a TUNEL assay (Fig. 6). Similarly, high backgrounds of  
308 apoptotic HSPCs were observed,  $17.5 \pm 0.1\%$  of HSPCs in untreated -OB samples and  $16.3 \pm$   
309  $2.8\%$  of HSPCs in untreated +OB samples staining positive for TUNEL (Fig. 6B). While there  
310 was not a statistically significant difference between any of the groups, we observed a moderate  
311 increase in TUNEL<sup>+</sup> HSPCs in +OB devices exposed to 5 Gy radiation ( $17.7 \pm 2.0\%$ ). There was a  
312 larger increase in TUNEL<sup>+</sup> HSPCs when exposed to 5 Gy radiation without the endosteal niche (-  
313 OB) present, with  $22.6 \pm 1.9\%$  of HSPCs apoptotic.

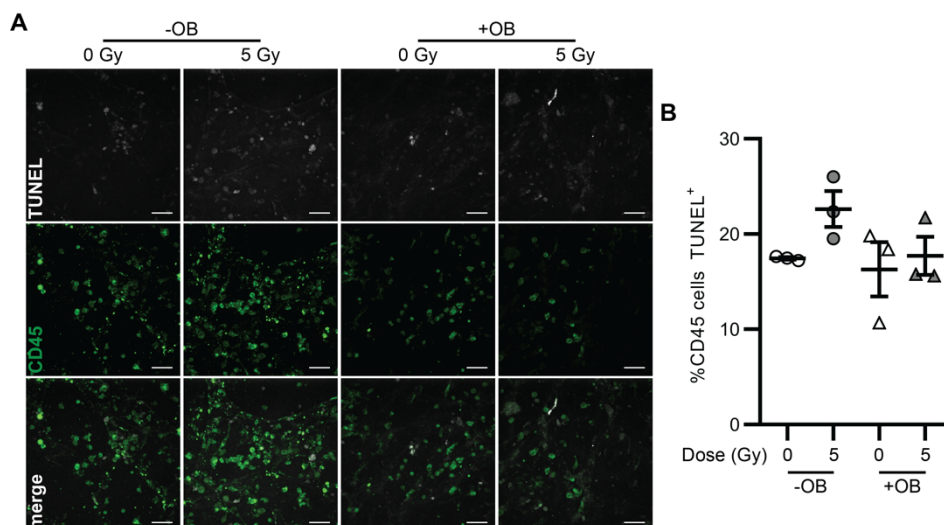

314  
315 **Fig. 6. Effect of endosteal niche on ionizing radiation damage to HSPCs.** (A) Representative  
316 images of TUNEL (white) and CD45 (green) staining of devices, with or without OBs, exposed to  
317 0 or 5 Gy radiation 24 hours after exposure. Scale bar: 50  $\mu$ m. (B) Quantification of percentage of  
318 TUNEL<sup>+</sup> CD45 cells, with (triangles) or without (circles) OBs, 24 hours after 0 (white) or 5 (grey)  
319 Gy. Data are shown as mean  $\pm$  SEM (n = 3 devices). Data analyzed using Kruskal-Wallis with  
320 Dunn's multiple comparisons test. No significance between groups (p < 0.1).

321



## 322 Discussion

323 We have developed a simple model of the hBM microenvironment that incorporates both the  
324 endosteal and perivascular niches and demonstrated that this approach for an hBM-on-a-chip  
325 generates basic cytokine and ECM expression characteristic of BM that has been observed *in vivo*.  
326 Additionally, we have shown that the inclusion of the endosteal layer and perivascular hMSCs  
327 impacts the proliferation and fate of HSPCs co-cultured within the device. Due to the limited  
328 volume of the current design, this model is not an appropriate approach for the *ex vivo* expansion  
329 of hematopoietic cells for eventual transplantation, however we believe the hBM-on-a-chip could  
330 be a useful tool for studying HSPC or other therapeutic cell interactions with specific BM  
331 microenvironments and the constituent stromal and hematopoietic cells. Inclusion of additional  
332 cell types, such as macrophages, osteoclasts, adipocytes, could easily be achieved and introduce  
333 additional nuance and complexity to this model. These studies could expand beyond normal  
334 conditions and the hBM-on-a-chip could be used as a platform for studying the effects of cancer,  
335 radiation, or other perturbed states, and for the screening of therapeutics that target BM resident  
336 cells to elicit a therapeutic response, such as mobilization.

337 The mobilization of HSPCs from the BM niche into peripheral blood for collection by apheresis is  
338 a critical process for in both autologous and allogeneic HSC transplantation (35). G-CSF has long  
339 been used in conjunction chemotherapy (typically cyclophosphamide) to mobilize BM HSPCs,  
340 however it is not effective in all patients. Previous chemotherapy or radiotherapy regimens, age,  
341 and disease burden are potential clinical variables that may cause poor mobilization (36-38). Over  
342 the last 20 years, AMD3100 (Mozobil, Plerixafor) has been developed and is now the second FDA  
343 approved mobilizing drug and is used, although at a significant increase in cost, as a second line  
344 treatment for patients who have failed G-CSF plus chemotherapy mobilization (39).

345 To measure the mobilization of HSPCs in hBM-on-a-chip, we developed a protocol that allowed  
346 for the periodic measurement of cell movement over a 24-hour period. We did so because we did  
347 not anticipate HSPCs would be drawn out of the hBM-on-a-chip, because there was no  
348 supplemented chemokine or existing gradient within the device that would direct the HSPCs in a  
349 specific direction. Rather, we hypothesized that mobilization would disrupt local signaling that  
350 was restricting HSPC movement and would therefore lead to an increase in either the magnitude or  
351 displacement of migration during a given time period.

352 While the mechanism of mobilization by AMD3100 is specific, G-CSF mobilization likely occurs  
353 through multiple pathways. G-CSF stimulates macrophages, osteoblasts, and osteoclasts to  
354 upregulate proteases (MMP9, cathepsins, etc.) that subsequently degrade CXCL12 and surface  
355 bound VLA-4 and CXCR4 on HSPCs (40-45). This disrupts the CXCL12-CXCR4 signaling axis  
356 and leads to an increase of HSPCs in peripheral blood. Because G-CSF mobilization is indirect

357 and is mediated by stromal cells, onset of mobilization by G-CSF is relatively slow, taking more  
358 than 24 hours to reach maximum mobilization (46). AMD3100 is an antagonist of CXCR4 and  
359 directly competes with CXCL12 for binding. Consequently, AMD3100 mobilization is faster than  
360 G-CSF, with HSPCs elevated in peripheral blood as early as 30 minutes post injection (47). When  
361 used in combination with G-CSF, AMD3100 mobilizes more CD34+ HSPCs and has more  
362 predictable kinetics than G-CSF alone (48-51). Currently preclinical mobilization studies are  
363 restricted to animal models (52) and a sophisticated *in vitro* platform could be beneficial to screen  
364 novel therapeutics on a large population of human samples or in a patient specific BM model to  
365 assess an individual's mobilization potential.

366 Mobilizing the HSPCs with G-CSF, we observed a dose specific response that lead to increased  
367 total length of migration and displacement over approximately a 14-hour period compared with the  
368 0-hour baseline in both vascularized endosteal niche (+OB) and perivascular (-OB) hBM-on-a-  
369 chip devices. The mechanism of G-CSF mobilization is believed to go through any number of BM  
370 resident cells (neutrophils, osteoblasts, osteoclasts, macrophages) (40-43) with MSCs being a  
371 notable exception. The potential mobilization observed in samples without OBs is curious and, if  
372 true, suggests that either MSCs can mediate G-CSF induced disruption of CXCL12 signaling or  
373 that G-CSF is directly activating increased movement in HSPCs.

374 Ionizing radiation (IR) damages the BM microenvironment and resident HSPCs, and can occur  
375 both in accidental and clinical situations (53). IR harms HSPCs, results in the depletion of mature  
376 hematopoietic cells, and causes a range of symptoms associated with hematopoietic syndrome, and  
377 in extreme cases, fatality. While the impacts of IR on the hematopoietic system are well  
378 characterized (54, 55), the corresponding effects of IR on the HSPC niche and the BM  
379 microenvironment are less understood. MSCs are surprisingly somewhat resistant to the effects of  
380 IR and have been observed to potentially provide protection to other radiation damaged cells (56).  
381 Conversely, the activity of both osteoblasts and endothelial cells are altered by exposure to IR.  
382 Osteoblast activity is downregulated (57-59), decreasing the deposition of endosteal matrix and  
383 possibly, in conjunction with upregulation of osteoclasts, causing loss of bone mass at a larger  
384 scale (60). This could lead to the loss of the endosteal niche for hematopoietic progenitor cells that  
385 may be counteracted by increased osteogenic differentiation of MSCs (61). Common to radiation  
386 damage to all tissue types, the vasculature in BM is damaged and blood flow is disturbed (57). The  
387 perivascular niche for HSPCs is likely damaged and recovery of this microenvironment is essential  
388 for the regeneration of the hematopoietic system. The effects of radiation have, in the past, been  
389 studied mostly in animal models, recently organ-on-chip systems have been explored for their  
390 potential application in radiobiology (62, 63). Using organ-on-chip systems to examine the  
391 biological response to radiation exposure not only moves preclinical studies away from animal  
392 models, but it may better recapitulate the response of human cells in radiation exposure situations.

393 Unexpectedly, exposure to relatively high doses of X-ray radiation (up to 10 Gy) did not induce a  
394 significant increase in cell death in vascularized endosteal niche hBM-on-a-chip (EC+MSC+OB),  
395 as measured by LDH release. There was a corresponding decrease, although not statistically  
396 significant, in cytokine expression 24 hours after radiation exposure. This suggested that the  
397 expression and, subsequently, the BM niche were potentially altered, albeit without widespread  
398 apoptosis of stromal cells. HSPCs cultured in the vascularized endosteal niche  
399 (HSPC+EC+MSC+OB) similarly did not exhibit a significant increase in apoptosis 24 hours after  
400 exposure as measured by damage to nuclear DNA (TUNEL). In comparison, we observed an  
401 increase, although not statistically significant, in TUNEL<sup>+</sup> HSPCs in the perivascular niche  
402 (HSPC+EC+MSC) after 5 Gy radiation exposure. MSCs have been reported to be resistant to  
403 damage associated with radiation exposure (56) and given the greater number of MSC derived  
404 cells in OB containing devices, the density of these radio-resistant (and potentially radio  
405 protective) cells could be mitigating damage to HSPCs. Further study measuring the production of  
406 reactive oxygen species (ROS) after radiation exposure of the perivascular and vascularized  
407 endosteal niches may help explain the difference in HSPC outcome in these microenvironments.

## 408 **Materials and Methods**

### 409 **Device design and fabrication**

410 Photomask (CAD/Art Services) was designed using AutoCAD software (Autodesk). An SU-8  
411 master mold was fabricated using previously described soft lithography techniques.(64) Briefly,  
412 SU-8 2150 (Microchem) was spun to a thickness of ~120 μm on a silicon wafer (University  
413 Wafers) using a G3P8 Spin Coater (SCS). SU-8 was exposed with UV light through the  
414 photomask using an MJB4 mask aligner (Suss Microtec). Uncrosslinked SU-8 was removed with  
415 SU-8 developer (Microchem) and silicon wafers were treated by vapor phase deposition of  
416 trichloro (1H, 1H, 2H, 2H-perfluorooctyl)silane (Sigma-Aldrich) to increase surface  
417 hydrophobicity.

418 Polydimethylsiloxane (PDMS) (Dow Corning) was mixed 10:1 (elastomer base: curing agent) and  
419 cast on silicone master mold. PDMS was cured at 65 °C. The PDMS layer containing the features  
420 was then removed from the master mold, a 3D printed reservoir mold was aligned on top and  
421 additional PMDS (10:1) was poured on top of the device to form media reservoirs. After curing at  
422 65 °C, loading ports were made using 1 mm biopsy punch (Integra Miltex). Devices were bonded  
423 to a thin film (~300 um) of PDMS (5:1) using a plasma cleaner (Harrick Plasma). Prior to use,  
424 devices were washed with 70% EtOH.

425 To promote cell adhesion, the central gel channel was coated with 0.01% dopamine HCl (Sigma-  
426 Aldrich) in TE Buffer [pH 8.5] for 1 hour at room temperature, washed with PBS, coated with 100  
427 μg/mL rat tail collagen I (Corning) in PBS for 1 hour at room temperature, washed with PBS, and

428 then dried overnight at 65 °C.(32) Devices were sterilized by UV exposure for at least 30 minutes  
429 prior to culture of cells.

430 Detailed methods can be found in Supplementary Methods.

### 431 **Cell culture**

432 Bone marrow derived human mesenchymal stem cells (hMSCs) (RoosterBio) were initially  
433 expanded in hMSC High Performance Media (RoosterBio) for a single passage. For subsequent  
434 passages, hMSCs were expanded in  $\alpha$ MEM (Sigma-Aldrich) supplemented with 10% FBS  
435 (Hyclone) and 1% penicillin-streptomycin (Hyclone). hMSCs were used for culture in devices up  
436 to passage 6. Human umbilical vein endothelial cells (HUVECs) (Lonza) were expanded in EBM-  
437 2MV (Lonza) on tissue culture flasks coated with 0.1% gelatin (Sigma-Aldrich) and used up to  
438 passage 8. Human BM CD34+ cells (Lonza) were expanded for 5 days in Stemline II (Sigma-  
439 Aldrich) supplemented with 100 ng/mL SCF, TPO, and G-CSF (Peprotech). All cells were  
440 cultured at 37 °C and 5% CO<sub>2</sub>.

### 441 **Osteogenesis in hBM-on-a-chip**

442 For the formation of the endosteal niche, hMSCs were seeded within the central gel channels of  
443 devices at a density of  $5 \times 10^5$  cells/mL. Cells were cultured within the devices for 21 days in  
444  $\alpha$ MEM osteogenic media (10% FBS, 1% penicillin-streptomycin, 10 mM  $\beta$ -glycerophosphate  
445 (Sigma-Aldrich), 50  $\mu$ M ascorbic acid (Sigma-Aldrich), and 100 nM dexamethasone (Sigma-  
446 Aldrich)) with daily media exchange.

### 447 **Alizarin red and von Kossa staining**

448 Osteogenic devices were washed with PBS, fixed with 4% formaldehyde in PBS for 15 minutes,  
449 and then washed with PBS. For Alizarin red staining, devices were washed twice with DI H<sub>2</sub>O and  
450 then stained for 5 minutes with 2% alizarin red (Sigma-Aldrich) in DI H<sub>2</sub>O [pH 4.1-4.3]. Alizarin  
451 red stain was removed by several washes with DI H<sub>2</sub>O, until liquid was clear. For von Kossa  
452 staining, devices were washed twice with DI H<sub>2</sub>O and then stained with 1% silver nitrate (Acros  
453 Organics) in DI H<sub>2</sub>O under a UV lamp for 15 minutes. Devices were washed twice with DI H<sub>2</sub>O  
454 and then incubated in 5% sodium thiosulfate (Acros Organics) in DI H<sub>2</sub>O for 5 minutes. Devices  
455 were then washed with DI H<sub>2</sub>O until liquid was clear. Stained devices were imaged using a  
456 Lionheart FX (BioTek Instruments). Color brightfield images were analyzed using open-source  
457 software ImageJ (<https://imagej.nih.gov/ij/index.html>). The red and green channels were used for  
458 von Kossa and Alizarin, respectively, to measure mean intensity and percent area.

### 459 **Vasculogenesis in hBM-on-a-chip**

460 Vasculogenesis in central gel channel was accomplished using previously reported approaches (33,  
461 65). Briefly, HUVECs ( $12 \times 10^6$  cells/mL) and MSCs ( $6 \times 10^5$  cells/mL) were suspended in EBM-

462 2MV supplemented with thrombin (4 U/mL) (Sigma-Aldrich). A solution of fibrinogen (8 mg/mL)  
463 (Sigma-Aldrich) and collagen I (2 mg/mL) (Corning) in PBS was loaded into a central gel channel  
464 reservoir. The HUVEC/MSC cell suspension was added to fibrinogen solution (1:1) and mixed  
465 thoroughly. (Final cell suspension: HUVECs ( $6 \times 10^6$  cells/mL), hMSCs ( $3 \times 10^5$  cells/mL), thrombin  
466 (2 U/mL), fibrinogen (4 mg/mL), collagen I (1 mg/mL)). Immediately, the hMSC/HUVEC cell  
467 suspension was withdrawn from the opposite central gel port, drawing the cell suspension through  
468 the central gel channel. Devices were then incubated for 15 minutes at 37 °C, 5% CO<sub>2</sub> to allow the  
469 fibrin gel to form. EBM-2MV was added to a reservoir on each side of gel channel and pulled  
470 through media channel, into connecting reservoir by using a micropipette to create negative  
471 pressure in the connecting 1-mm port. Cells were cultured with daily media exchange for 5 days to  
472 allow for vasculogenesis. Media was supplemented with VEGF (50 ng/mL) on day 2 and with  
473 VEGF (50 ng/mL) and angiopoietin-1 (ANG-1) (100 ng/mL) (Peprotech) on days 3, 4, and 5.

#### 474 **Immunofluorescence staining**

475 Staining procedure for devices was adapted from Chen *et al* 2007 (27). Devices were washed with  
476 PBS, fixed with 4% formaldehyde (ThermoFisher), and permeabilized with 0.1% Triton X-100.  
477 Prior to staining, cells were blocked with 5% BSA, 3% goat serum in PBS. Primary antibodies  
478 were diluted (1:100) in blocking buffer and devices were stained overnight at 4 °C. Devices were  
479 then washed with 0.1% BSA in PBS and stained with secondary antibodies (1:200) and Phalloidin  
480 AF647 (1:40) diluted in wash buffer for 3 hours at RT. Devices were washed with wash buffer and  
481 stored at 4 °C until imaging. For immunofluorescence imaging of cytokines and ECM in full  
482 hBM-on-a-chip devices, samples were imaged using an UltraVIEW VoX spinning disk confocal  
483 microscope (PerkinElmer). For detailed information on antibodies, see Table S2.

#### 484 **Vascular network analysis**

485 Devices stained with Alexa Fluor 647 anti-human CD31 (BioLegend) and Alexa Fluor 594  
486 Phalloidin (ThermoFisher) were imaged using a Lionheart FX (BioTek Instruments). Images were  
487 processed using open-source software ImageJ and contrast corrected images were analyzed using  
488 Angiotool(66) to measure percent area and total network length.

#### 489 **Multiplex cytokine detection**

490 Media was collected from devices at designated time by collecting media from one side of device,  
491 waiting for 5 minutes to allow for gravity driven flow through the device and then collection of all  
492 media from reservoirs. Device media was immediately stored on ice and then flash frozen in liquid  
493 N<sub>2</sub> for storage prior to analysis. Samples were thawed on ice prior to detection and analysis using  
494 LEGENDplex human hematopoietic stem cell panel (BioLegend), according to manufacturer's  
495 protocol.



496 **CD34+ HSPCs culture in hBM-on-a-chip**

497 BM CD34+ HSPCs were labelled with PKH67 green fluorescent cell stain (Sigma-Aldrich) and  
498 loaded at a final concentration of  $3 \times 10^5$  (20:1 HUVEC:HSPC ratio,  $6 \times 10^5$  HSPCs/mL in thrombin  
499 cell suspension prior to mixing with fibrinogen). This concentration results in ~500 HSPCs within  
500 the central channel. Devices were imaged on days 1, 3, and 5 after loading using a Lionheart FX  
501 (BioTek Instruments). Images were analyzed using Gen5 (BioTek Instruments) to count the  
502 number of HSPCs and progenitors at each time point.

503 **Mobilization of HSPCs**

504 After 5 days of culture, hBM-on-a-chips were imaged periodically to measure the “mobilization”  
505 of CD34+ HSPCs. Baseline measurements were made at 0 hours, after which supernatants were  
506 collected and was replaced with media supplemented with mobilizing agents at indicated  
507 concentrations. Samples were imaged at intervals of 2 hours for 24 hours for a total of 13 image  
508 sessions. During each image session, devices were imaged at intervals of 5 minutes for 15 minutes,  
509 for a total of 4 time points. Samples were imaged using a Cytation 3 (BioTek Instruments) and  
510 automated imaging of multiple plates was achieved using a BioSpa 3 (BioTek Instruments). Image  
511 sequences were imported into Volocity software (PerkinElmer), cells were tracked within each  
512 image session, and the length and displacement of individual cells were measured at each time  
513 point.

514 **Radiation exposure**

515 On day 5, hBM-on-a-chip devices were transported to an animal facility and exposed to ionizing  
516 radiation using an RS 2000 X-ray Irradiator (Rad Source). To control for effects of transportation,  
517 untreated samples were also transported to the facility. The duration of the process (transportation  
518 to and from the facility and X-ray exposure) was ~1 hour, during which time the samples were not  
519 held at 37 °C, 5% CO<sub>2</sub>.

520 **TUNEL assay**

521 DNA damage to HSPCs was observed using terminal deoxynucleotidyl transferase-mediated  
522 dUTP-biotin nick-end labelling (TUNEL) immunostaining (Click-iT TUNEL Alexa Fluor Assay  
523 Kit, ThermoFisher) according to the manufacturer’s protocol. Briefly, formaldehyde fixed devices  
524 were first permeabilized with Triton-X100 (Avocado). Next, terminal deoxynucleotidyl transferase  
525 (TdT) was used to incorporate dUTP into double stranded breaks of DNA. Alexa Fluor 647 azide  
526 was then bound to dUTP using click chemistry. As membrane stains of HSPCs do not survive  
527 Triton-X100 permeabilization, HSPCs were then stained overnight using anti-human CD45 Alexa  
528 Fluor 488 (BioLegend). Samples were imaged using a spinning disk confocal microscope  
529 (PerkinElmer) and images were analyzed using Volocity software (PerkinElmer).

530 **Statistical analysis**

531 Sample sizes are indicated in the figure captions and individual data points are shown. GraphPad  
532 Prism was used for statistical analysis. Groups were tested for normality using the Shapiro-Wilk  
533 normality test. If all groups in an experiment passed normality test, one-way ANOVA with  
534 Tukey's multiple comparison test was used. If a single group did not pass normality test, Kruskal-  
535 Wallis with Dunn's multiple comparison test was used.

536 **H2: Supplementary Materials**

537 **Supplementary Methods**

538 Fig. S1. Detailed schematic of hBM-on-a-chip design and fabrication.

539 Fig. S2. ECM coating to promote cellular adhesion to PDMS and "survival" of device air-liquid  
540 interface during culture.

541 Fig. S3. Optimization of cytokine and hydrogel conditions for vasculogenesis.

542 Fig. S4. Effect of stromal cells on CD34+ BM HSPCs in hBM-on-a-chip.

543 Fig. S5. Measuring mobilization in hBM-on-a-chip.

544 Fig. S6. Effective X-ray radiation dose and effect of radiation on cytokine secretion in hBM-on-a-  
545 chip.

546 Table S1. List of materials.

547 Table S2. Antibodies and dilutions.

548 Table S3. Primary cell sources.

549 **Acknowledgements**

550 We would like to acknowledge the Petit Institute Core Facilities for their services and shared  
551 resources that enabled us to produce this publication. **Funding:** This research was supported by  
552 funding from the Georgia Tech Foundation (to K.R.), Georgia Tech Research Alliance (to K.R.),  
553 the Marcus foundation (to K.R.), NSF Engineering Research Center Grant (NSF EEC 1648035 to  
554 K.R.), and NSF Graduate Research Fellowship under Grant No. DGE-1148903 (to M.R.N., D.G.  
555 and J.C.M.). **Author contributions:** M.R.N. designed and performed experiments, analyzed data,  
556 wrote the manuscript. D.G, J.C.M., D.F.R., and E.K. performed experiments, analyzed data, and  
557 edited the manuscript. KR designed experiments and edited the manuscript. **Competing interests:**  
558 The authors declare that they have no competing interests. **Data and materials availability:** All  
559 data needed to evaluate the conclusions in the paper are present in the paper and/or in the  
560 Supplementary Materials. Additional data related to this paper may be requested from the authors.  
561 Correspondence and requests for materials should be addressed to K.R. (email:  
562 krish.roy@gatech.edu).

## 563 References and Notes

- 564 1. V. W. Yu, D. T. Scadden, Hematopoietic Stem Cell and Its Bone Marrow Niche. *Curr Top*  
565 *Dev Biol* **118**, 21-44 (2016).
- 566 2. S. J. Morrison, D. T. Scadden, The bone marrow niche for haematopoietic stem cells. *Nature*  
567 **505**, 327-334 (2014).
- 568 3. M. Hines, L. Nielsen, J. Cooper-White, The hematopoietic stem cell niche: what are we trying  
569 to replicate? *Journal of Chemical Technology & Biotechnology* **82**, 1115-1121 (2008).
- 570 4. A. Wilson, A. Trumpp, Bone-marrow haematopoietic-stem-cell niches. *Nat Rev Immunol* **6**,  
571 93-106 (2006).
- 572 5. P. E. Bourguine, I. Martin, T. Schroeder, Engineering Human Bone Marrow Proxies. *Cell Stem*  
573 *Cell* **22**, 298-301 (2018).
- 574 6. L. M. Calvi *et al.*, Osteoblastic cells regulate the haematopoietic stem cell niche. *Nature* **425**,  
575 841-846 (2003).
- 576 7. J. Zhang *et al.*, Identification of the haematopoietic stem cell niche and control of the niche  
577 size. *Nature* **425**, 836-841 (2003).
- 578 8. M. J. Kiel, S. J. Morrison, Maintaining hematopoietic stem cells in the vascular niche.  
579 *Immunity* **25**, 862-864 (2006).
- 580 9. L. Ding, T. L. Saunders, G. Enikolopov, S. J. Morrison, Endothelial and perivascular cells  
581 maintain haematopoietic stem cells. *Nature* **481**, 457-462 (2012).
- 582 10. J. Y. Chen *et al.*, Hoxb5 marks long-term haematopoietic stem cells and reveals a homogenous  
583 perivascular niche. *Nature* **530**, 223-227 (2016).
- 584 11. S. L. Ellis, S. K. Nilsson, The location and cellular composition of the hemopoietic stem cell  
585 niche. *Cytotherapy* **14**, 135-143 (2012).
- 586 12. Y. Omatsu *et al.*, The essential functions of adipo-osteogenic progenitors as the hematopoietic  
587 stem and progenitor cell niche. *Immunity* **33**, 387-399 (2010).
- 588 13. S. Mendez-Ferrer *et al.*, Mesenchymal and haematopoietic stem cells form a unique bone  
589 marrow niche. *Nature* **466**, 829-834 (2010).
- 590 14. L. Ding, S. J. Morrison, Haematopoietic stem cells and early lymphoid progenitors occupy  
591 distinct bone marrow niches. *Nature* **495**, 231-235 (2013).
- 592 15. J. A. Spencer *et al.*, Direct measurement of local oxygen concentration in the bone marrow of  
593 live animals. *Nature* **508**, 269-273 (2014).
- 594 16. Y. Kunisaki *et al.*, Arteriolar niches maintain haematopoietic stem cell quiescence. *Nature*  
595 **502**, 637-643 (2013).
- 596 17. M. Acar *et al.*, Deep imaging of bone marrow shows non-dividing stem cells are mainly  
597 perisinusoidal. *Nature* **526**, 126 (2015).
- 598 18. T. Itkin *et al.*, Distinct bone marrow blood vessels differentially regulate haematopoiesis.  
599 *Nature* **532**, 323 (2016).
- 600 19. M. R. Nelson, K. Roy, Bone-marrow mimicking biomaterial niches for studying  
601 hematopoietic stem and progenitor cells. *J Mater Chem B* **4**, 3490-3503 (2016).
- 602 20. M. P. Lutolf, H. M. Gilbert Pm Fau - Blau, H. M. Blau, Designing materials to direct stem-cell  
603 fate.
- 604 21. J. S. Choi, B. P. Mahadik, B. A. Harley, Engineering the hematopoietic stem cell niche:  
605 Frontiers in biomaterial science. *Biotechnol J* **10**, 1529-1545 (2015).
- 606 22. B. P. Mahadik, S. Pedron Haba, L. J. Skertich, B. A. C. Harley, The use of covalently  
607 immobilized stem cell factor to selectively affect hematopoietic stem cell activity within a  
608 gelatin hydrogel. *Biomaterials* **67**, 297-307 (2015).
- 609 23. L. Jansen, T. McCarthy, M. Lee, S. Peyton, A synthetic, three-dimensional bone marrow  
610 hydrogel. *bioRxiv*, 275842 (2018).
- 611 24. Y. S. Torisawa *et al.*, Bone marrow-on-a-chip replicates hematopoietic niche physiology in  
612 vitro. *Nat Methods* **11**, 663-669 (2014).
- 613 25. B. M. Holzapfel *et al.*, Tissue engineered humanized bone supports human hematopoiesis in  
614 vivo. *Biomaterials* **61**, 103-114 (2015).
- 615 26. A. Marturano-Kruik *et al.*, Human bone perivascular niche-on-a-chip for studying metastatic  
616 colonization. *Proc Natl Acad Sci U S A* **115**, 1256-1261 (2018).

- 617 27. M. B. Chen *et al.*, On-chip human microvasculature assay for visualization and quantitation of  
618 tumor cell extravasation dynamics. *Nature Protocols* **12**, 865 (2017).
- 619 28. S. Oh *et al.*, "Open-top" microfluidic device for in vitro three-dimensional capillary beds. *Lab*  
620 *Chip* **17**, 3405-3414 (2017).
- 621 29. D. T. T. Phan *et al.*, A vascularized and perfused organ-on-a-chip platform for large-scale drug  
622 screening applications. *Lab Chip* **17**, 511-520 (2017).
- 623 30. S. P. Desai, D. M. Freeman, J. Voldman, Plastic masters-rigid templates for soft lithography.  
624 *Lab Chip* **9**, 1631-1637 (2009).
- 625 31. W. Wu, J. Wu, J. H. Kim, N. Y. Lee, Instantaneous room temperature bonding of a wide range  
626 of non-silicon substrates with poly(dimethylsiloxane) (PDMS) elastomer mediated by a  
627 mercaptosilane. *Lab Chip* **15**, 2819-2825 (2015).
- 628 32. Y. J. Chuah *et al.*, Simple surface engineering of polydimethylsiloxane with polydopamine for  
629 stabilized mesenchymal stem cell adhesion and multipotency. *Sci Rep* **5**, 18162 (2015).
- 630 33. J. S. Jeon *et al.*, Generation of 3D functional microvascular networks with human  
631 mesenchymal stem cells in microfluidic systems. *Integr Biol (Camb)* **6**, 555-563 (2014).
- 632 34. X. L. Wang *et al.*, Engineering anastomosis between living capillary networks and endothelial  
633 cell-lined microfluidic channels. *Lab on a Chip* **16**, 282-290 (2016).
- 634 35. G. Pesek, M. Cottler-Fox, Hematopoietic stem cell mobilization: a clinical protocol. *Methods*  
635 *Mol Biol* **904**, 69-77 (2012).
- 636 36. S. Kumar *et al.*, Impact of lenalidomide therapy on stem cell mobilization and engraftment  
637 post-peripheral blood stem cell transplantation in patients with newly diagnosed myeloma.  
638 *Leukemia* **21**, 2035-2042 (2007).
- 639 37. J. M. Vose *et al.*, Advances in mobilization for the optimization of autologous stem cell  
640 transplantation. *Leukemia & lymphoma* **50**, 1412-1421 (2009).
- 641 38. U. Sahin, T. Demirer, Current strategies for the management of autologous peripheral blood  
642 stem cell mobilization failures in patients with multiple myeloma. *J Clin Apher* **33**, 357-370  
643 (2018).
- 644 39. L. Chaudhary *et al.*, Peripheral blood stem cell mobilization in multiple myeloma patients treat  
645 in the novel therapy-era with plerixafor and G-CSF has superior efficacy but significantly  
646 higher costs compared to mobilization with low-dose cyclophosphamide and G-CSF. *J Clin*  
647 *Apher* **28**, 359-367 (2013).
- 648 40. H. Bonig, T. Papayannopoulou, Mobilization of hematopoietic stem/progenitor cells: general  
649 principles and molecular mechanisms. *Methods Mol Biol* **904**, 1-14 (2012).
- 650 41. I. Petit *et al.*, G-CSF induces stem cell mobilization by decreasing bone marrow SDF-1 and  
651 up-regulating CXCR4. *Nat Immunol* **3**, 687-694 (2002).
- 652 42. J. P. Levesque, J. Hendy, Y. Takamatsu, P. J. Simmons, L. J. Bendall, Disruption of the  
653 CXCR4/CXCL12 chemotactic interaction during hematopoietic stem cell mobilization  
654 induced by G-CSF or cyclophosphamide. *J Clin Invest* **111**, 187-196 (2003).
- 655 43. A. M. Greenbaum, D. C. Link, Mechanisms of G-CSF-mediated hematopoietic stem and  
656 progenitor mobilization. *Leukemia* **25**, 211-217 (2011).
- 657 44. H. Bonig, T. Papayannopoulou, Hematopoietic stem cell mobilization: updated conceptual  
658 renditions. *Leukemia* **27**, 24-31 (2013).
- 659 45. G. Klein, O. Schmal, W. K. Aicher, Matrix metalloproteinases in stem cell mobilization.  
660 *Matrix biology : journal of the International Society for Matrix Biology* **44-46**, 175-183  
661 (2015).
- 662 46. M. H. Cottler-Fox *et al.*, Stem cell mobilization. *Hematology Am Soc Hematol Educ Program*,  
663 419-437 (2003).
- 664 47. W. C. Liles *et al.*, Mobilization of hematopoietic progenitor cells in healthy volunteers by  
665 AMD3100, a CXCR4 antagonist. *Blood* **102**, 2728-2730 (2003).
- 666 48. A. F. Cashen, H. M. Lazarus, S. M. Devine, Mobilizing stem cells from normal donors: is it  
667 possible to improve upon G-CSF? *Bone marrow transplantation* **39**, 577-588 (2007).
- 668 49. J. F. DiPersio *et al.*, Plerixafor and G-CSF versus placebo and G-CSF to mobilize  
669 hematopoietic stem cells for autologous stem cell transplantation in patients with multiple  
670 myeloma. *Blood* **113**, 5720-5726 (2009).

- 671 50. C. J. Fowler *et al.*, Rescue from failed growth factor and/or chemotherapy HSC mobilization  
672 with G-CSF and plerixafor (AMD3100): an institutional experience. *Bone marrow*  
673 *transplantation* **43**, 909-917 (2009).
- 674 51. M. Mohty, A. D. Ho, In and out of the niche: perspectives in mobilization of hematopoietic  
675 stem cells. *Exp Hematol* **39**, 723-729 (2011).
- 676 52. S. C. Pitchford, S. M. Rankin, Combinatorial stem cell mobilization in animal models.  
677 *Methods Mol Biol* **904**, 139-154 (2012).
- 678 53. A. Paix *et al.*, Total body irradiation in allogeneic bone marrow transplantation conditioning  
679 regimens: A review. *Critical reviews in oncology/hematology* **123**, 138-148 (2018).
- 680 54. M. H. Barcellos-Hoff, C. Park, E. G. Wright, Radiation and the microenvironment -  
681 tumorigenesis and therapy. *Nat Rev Cancer* **5**, 867-875 (2005).
- 682 55. T. M. Fliedner, D. Graessle, C. Paulsen, K. Reimers, Structure and function of bone marrow  
683 hemopoiesis: mechanisms of response to ionizing radiation exposure. *Cancer Biother*  
684 *Radiopharm* **17**, 405-426 (2002).
- 685 56. T. Sugrue, N. F. Lowndes, R. Ceredig, Mesenchymal stromal cells: radio-resistant members of  
686 the bone marrow. *Immunol Cell Biol* **91**, 5-11 (2013).
- 687 57. J. S. Greenberger, M. Epperly, Bone marrow-derived stem cells and radiation response.  
688 *Seminars in radiation oncology* **19**, 133-139 (2009).
- 689 58. M. Dominici *et al.*, Restoration and reversible expansion of the osteoblastic hematopoietic  
690 stem cell niche after marrow radioablation. *Blood* **114**, 2333-2343 (2009).
- 691 59. X. Cao *et al.*, Irradiation induces bone injury by damaging bone marrow microenvironment for  
692 stem cells. *Proc Natl Acad Sci U S A* **108**, 1609-1614 (2011).
- 693 60. D. E. Green, C. T. Rubin, Consequences of irradiation on bone and marrow phenotypes, and  
694 its relation to disruption of hematopoietic precursors. *Bone* **63**, 87-94 (2014).
- 695 61. G. Poncin *et al.*, Characterization of spontaneous bone marrow recovery after sublethal total  
696 body irradiation: importance of the osteoblastic/adipocytic balance. *PLoS One* **7**, e30818  
697 (2012).
- 698 62. S. Jalili-Firoozinezhad *et al.*, Modeling radiation injury-induced cell death and countermeasure  
699 drug responses in a human Gut-on-a-Chip. *Cell Death Dis* **9**, 223 (2018).
- 700 63. Y. S. Torisawa *et al.*, Modeling Hematopoiesis and Responses to Radiation Countermeasures  
701 in a Bone Marrow-on-a-Chip. *Tissue Eng Part C Methods* **22**, 509-515 (2016).
- 702 64. T. J. Levario, M. Zhan, B. Lim, S. Y. Shvartsman, H. Lu, Microfluidic trap array for  
703 massively parallel imaging of *Drosophila* embryos. *Nat Protoc* **8**, 721-736 (2013).
- 704 65. J. S. Jeon *et al.*, Human 3D vascularized organotypic microfluidic assays to study breast  
705 cancer cell extravasation. *Proc Natl Acad Sci U S A* **112**, 214-219 (2015).
- 706 66. E. Zudaire, L. Gambardella, C. Kurcz, S. Vermeren, A computational tool for quantitative  
707 analysis of vascular networks. *PLoS One* **6**, e27385 (2011).
- 708 67. X. Wang *et al.*, Engineering anastomosis between living capillary networks and endothelial  
709 cell-lined microfluidic channels. *Lab Chip* **16**, 282-290 (2016).

710
